# Supplementary material for: Specific Human Milk Oligosaccharides Differentially Promote Th1 and Regulatory Responses in a CpG-Activated Epithelial/Immune Cell Coculture
Source: MDPI journal article supplement (doi:10.3390/biom13020263), 2023-01-31
Supplement: s1 [file s1]

## Supplemental Material

**Table S1** Overview of antibodies used for flow cytometry. Appropriate isotype controls were used for FMO stainings. All antibodies were purchased from eBioscience or Biolegend and titrated prior to use.

| Marker | Fluorochrome      | Clone     | isotype    | Dilution |
|--------|-------------------|-----------|------------|----------|
| CD4    | PerCP Cyanine 5.5 | OKT4      | m IgG2b, k | 1:320    |
| CD25   | Alexa Fluor 488   | BC96      | m IgG1, k  | 1:150    |
| CXCR3  | Alexa Fluor 488   | 1C6/CXCR3 | m IgG1, k  | 1:80     |
| CRTH2  | APC               | BM16      | r IgG2a, k | 1:150    |
| FoxP3  | APC               | PCH101    | r IgG2a, k | 1:320    |

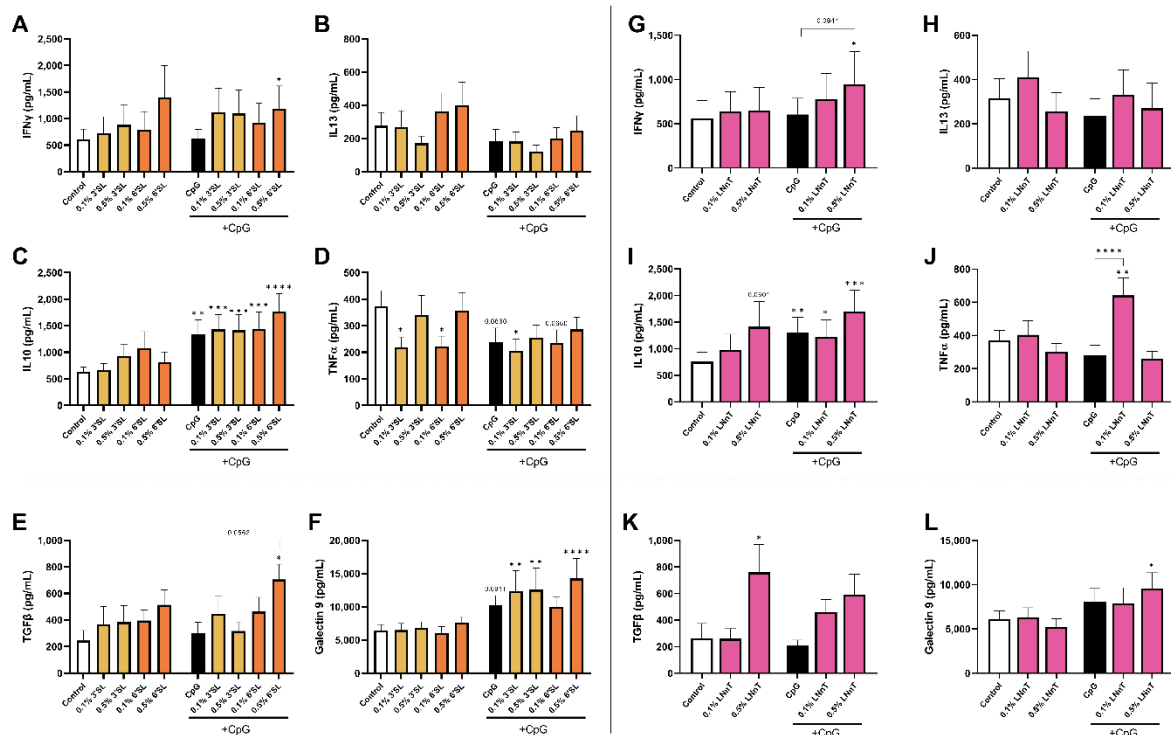

**Figure S1.** 24h After preincubation of IEC with HMOS, IEC were cocultured with activated PBMCs for another 24h while fresh HMOS and/ or CpG were added to the apical compartment of the transwell. After this coculture, cytokine secretion was measured in the basolateral compartment. Inserts containing IEC were transferred to a new plate, HMOS and CpG were washed away and IEC were cultured for another 24h to detect secreted TGF $\beta$  and galectin-9 in the basolateral compartment. Release of A) IFN $\gamma$ , B) IL13, C) IL10 and D) TNF $\alpha$  upon coculture of IEC and activated PBMC with synthetic produced 3'SL and 6'SL, as well as IEC derived E) TGF $\beta$  and F) galectin-9 after coculture. In addition, release of G) IFN $\gamma$ , H) IL13, I) IL10 and J) TNF $\alpha$  upon coculture of IEC and activated PBMC while exposing IEC to synthetic produced LNnT was determined, as well as IEC derived K) TGF $\beta$  and L) galectin-9 after coculture. Data is analyzed by One-Way ANOVA followed by a Bonferroni post-hoc test,  $n = 9$  independent experiments using different PBMC donors, mean  $\pm$  SEM (\*  $p < 0.05$ , \*\*  $p < 0.01$ , \*\*\*  $p < 0.001$ , \*\*\*\*  $p < 0.0001$ ).
